# Supplementary material for: Insertion of CS2into the Mg–H bond: synthesis and structural characterization of the magnesium dithioformate complex, [TismPriBenz]Mg(κ2-S2CH)
Source: Royal Society of Chemistry journal article supplement (doi:10.1039/c8dt01947a), 2018-01-01

## SUPPORTING INFORMATION

**Insertion of CS<sub>2</sub> into the Mg–H Bond: Synthesis and Structural  
Characterization of the Magnesium Dithioformate Complex,  
[Tism<sup>Pr<sup>i</sup>Benz</sup>]Mg(κ<sup>2</sup>-S<sub>2</sub>CH)**

Michael Rauch and Gerard Parkin,\*

*Department of Chemistry,*

*Columbia University,*

*New York, New York 10027, USA.*

---

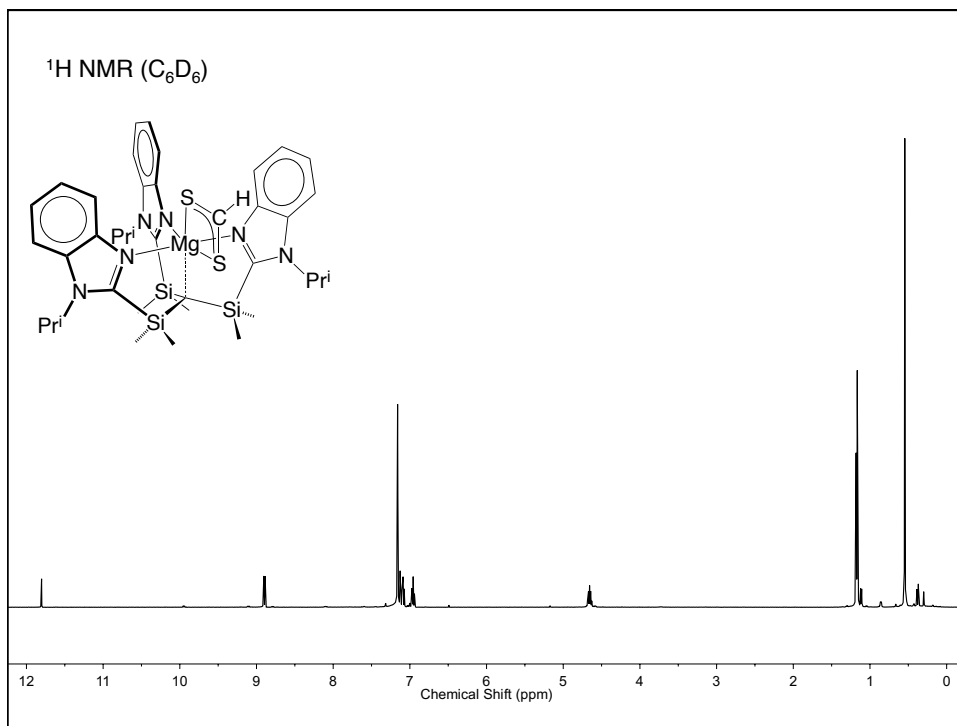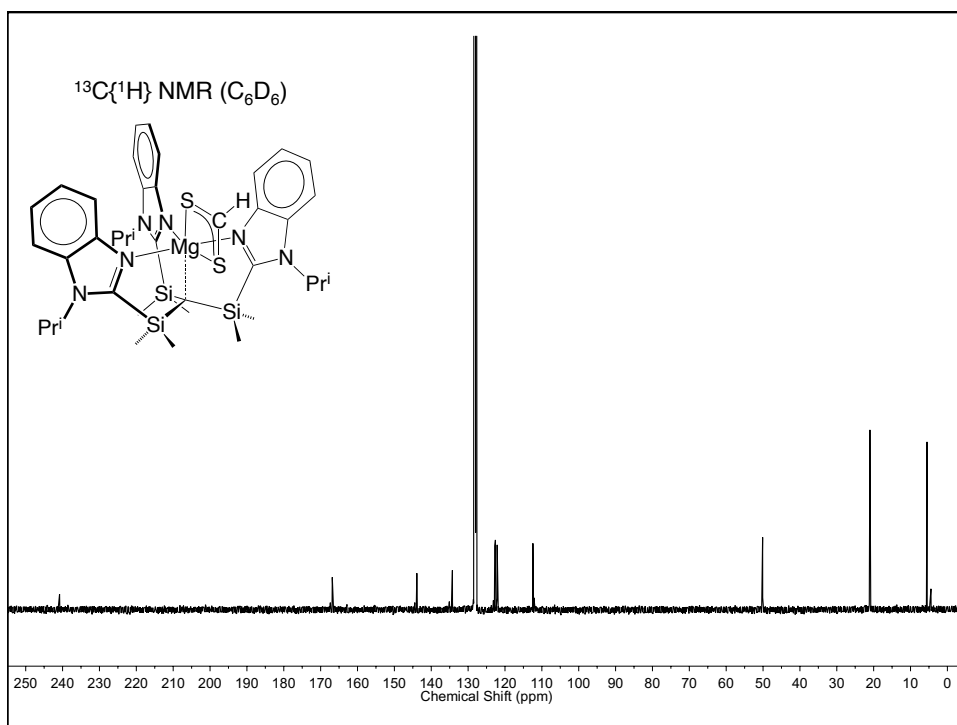

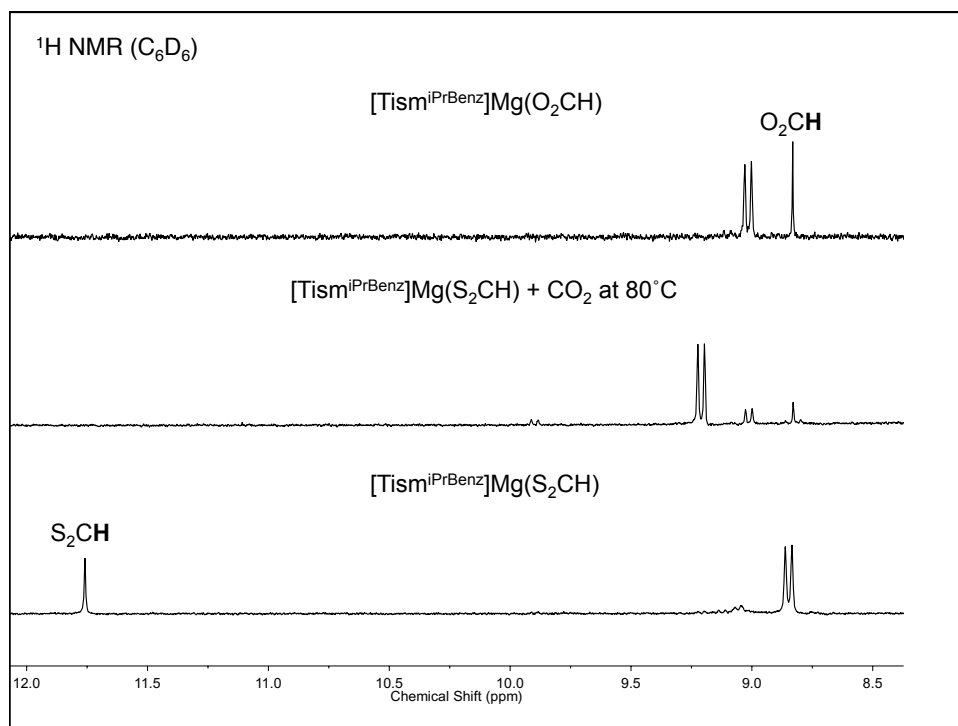

Supplement: c8dt01947a1.pdf [file c8dt01947a1.pdf]
